# Supplementary material for: A novel computed method to reconstruct the bilateral digital interarticular channel of atlas and its use on the anterior upper cervical screw fixation
Source: PeerJ. 2016 Feb 23;4:e1737. doi: 10.7717/peerj.1737 (PMC4768695; doi:10.7717/peerj.1737)
Supplement: Data S1 [file peerj-04-1737-s001.xlsx]

## Sheet: Total
		Fitted inscribed circles-Left				Fitted inscribed circles-Right				Fitted ellipses-Left						Fitted ellipses-Right
Gender	No.	α	β	Diameters of C0-1	Diameters of C1-2	α	β	Diameters of C0-1	Diameters of C1-2	α	β	Long axis of C0-C1	Short axis of C0-C1	Long axis of C1-C2	Short axis of C1-C2	α	β	Long axis of C0-C1	Short axis of C0-C1	Long axis of C1-C2	Short axis of C1-C2
Male	1	12.54	15.18	8.64	11.36	11.92	12.34	9.38	10.75	13.29	14.53	12.35	9.35	16.37	13.23	11.46	11.08	14.48	10.38	13.35	10.81
	2	10.84	12.35	10.15	12.83	13.15	11.58	12.68	12.82	14.61	12.25	14.57	10.46	16.39	12.61	12.91	12.43	18.43	14.23	17.82	13.35
	3	15.73	17.67	13.19	13.39	16.11	16.82	13.02	12.99	16.5	18.92	16.96	14.84	19.73	14.58	18.53	15.57	19.11	13.85	17.25	12.85
	4	14.83	14.58	15.03	16.02	15.34	14.63	15.39	16.34	17.57	15.25	19.65	15.34	20.66	16.23	16.11	15.69	19.46	16.37	19.84	16.96
	5	10.56	9.72	15.8	16.97	10.64	12.58	16.09	16.39	14.93	9.46	18.37	16.53	22.82	18.66	13.48	13.07	20.99	16.93	18.27	15.57
	6	13.18	10.08	8.43	9.06	13.56	11.32	10.71	12.03	15.03	11.23	11.06	8.83	16.56	10.83	14.46	11.32	15.84	12.27	15.53	12.84
	7	12.71	17.44	15.08	15.25	13	21.36	12.42	15.35	15.54	18.46	18.37	15.12	21.91	16.21	15.81	20.57	17.25	12.36	19.96	15.93
	8	17.63	15.5	10.49	12.6	19.01	19.73	8.71	10.68	19.57	16.63	14.56	11.85	18.32	14.46	18.89	20.54	15.17	9.95	16.45	11.36
	9	14.58	22.23	14.62	14.79	12.49	16.14	15.97	15.09	16.58	21.25	20.34	15.24	19.08	16.18	15.4	14.11	20.84	15.63	19.18	16.63
	10	7.71	16.12	15.73	17.1	11.09	20.09	15.92	16.85	10.47	16.79	20.57	16.44	21.27	17.46	13.57	19.97	19.38	16.34	20.64	17.21
	11	9.8	8.47	16.63	16.68	10.23	11.42	17.47	16.61	10.71	9.46	19.84	16.68	20.18	16.85	14.27	11.36	22.26	17.88	19.68	16.24
	12	11.44	15.81	12.71	11.57	9.83	14.78	8.97	11.19	14.36	15.55	18.77	13.03	16.88	11.35	12.84	14.37	15.47	10.53	17.26	12.66
	13	12.14	17.38	15.96	15.83	12.25	20.32	14.26	17.45	12.22	17.34	22.34	16.99	18.92	15.95	11.92	20.33	18.02	14.25	20.94	17.84
	14	12.28	20.04	11.78	13.95	14.14	18.91	11.01	10.36	13.85	18.73	14.99	12.44	18.33	14.22	16.53	18.63	15.17	11.96	14.08	10.26
	15	18.15	12.48	12.2	15.83	15.57	16.03	14.55	15.78	18.04	12.4	16.24	12.75	20.38	16.47	15.64	15.9	19.84	14.13	19.43	16.85
	16	8.66	18.15	9.89	12	10.04	19.63	11.48	14.61	12.76	19.33	13.67	10.52	18.46	14.85	13.88	18.34	15.63	11.34	19.95	14.26
	17	15.81	15.18	12.88	15.01	16.13	12.37	15.81	16.39	16.71	16.12	17.74	12.86	18.49	15.88	17.35	14.46	19.84	16.22	20.14	16.74
	18	13.13	15.09	10.07	11.16	13.25	17.51	12.19	15.7	16.53	15.35	16.34	10.05	16.93	12.34	16.75	15.35	16.46	12.88	19.95	15.34
	19	10.04	12.22	13.33	13.55	13.47	14.07	11.63	10.16	14.75	12.24	16.9	14.12	15.13	13.56	15.33	15.11	15.94	12.24	15.36	10.78
	20	15.32	10.75	14.02	16.02	16.57	11.23	12.34	15.16	18.28	11.48	20.26	14.87	20.85	16.14	19.53	13.95	17.63	12.95	21.84	15.43
	21	8.2	18.23	13.74	17.47	10.19	14.72	15.52	16.37	11.5	18.49	18.84	13.55	21.9	17.88	15.77	14.42	19.43	16.64	19.48	16.74
	22	12.19	15.08	12.03	14.83	13.12	17.58	12.87	14.84	15.15	14.32	19.98	12.99	18.24	15.56	13.38	18.95	16.89	13.74	17.35	14.95
	23	15.09	11.39	18.29	16.27	18.01	12.8	16.1	16.32	13.23	14.16	24.24	19.49	20.63	17.73	18.26	12.42	18.54	15.33	20.84	16.06
	24	12.31	16.58	8.45	8.99	11.73	18.81	10.27	11.28	15.35	16.78	14.36	9.37	13.81	9.87	12.93	19.44	17.89	11.74	16.13	12.37
	25	10.75	14.17	10.01	11.45	13.67	14.25	11.58	12.19	14.25	15.29	14.23	10.85	16.36	11.94	14.25	13.84	15.84	11.36	18.68	12.95
	26	9.22	12.09	12.48	14.65	9.68	11.04	11.27	11.21	10.29	11.39	17.42	14.14	21.32	15.05	10.55	12.23	17.75	12.13	17.49	12.53
	27	15.08	20.44	9.98	10.82	14.04	16.83	10.79	10.53	18.12	18.64	14.77	11.18	15.93	11.85	15.12	17.18	15.36	11.95	13.77	10.84
	28	11.39	11.79	7.32	10.93	14.74	12.87	9.27	11.39	14.23	12.77	12.81	8.94	17.35	10.95	15.58	11.66	12.83	10.06	17.12	12.88
	29	12.54	16.75	16.12	16.82	10.82	15.32	14.73	13.25	14.27	17.34	18.46	16.5	20.8	17.53	14.69	17.83	17.37	14.45	19.94	13.24
	30	14.17	15.64	14.36	15.83	12.49	13.78	11.04	12.85	15.83	15.59	19.92	15.48	19.53	15.98	16.23	14.46	15.55	12.72	16.52	13.65
Female	1	11.38	17.38	7.46	7.85	13.35	15.18	8.26	8.29	13.48	16.53	11.36	8.27	11.25	8.37	16.35	15.28	11.25	8.38	12.12	9.28
	2	15.27	14.21	8.19	9.03	15.84	15.27	7.59	7.27	18.12	16.84	13.91	8.18	12.81	8.81	15.94	14.17	12.49	7.29	12.47	7.89
	3	14.65	18.16	9.16	9.22	12.83	19.09	6.29	6.93	16.54	15.48	12.75	9.7	14.45	10.95	12.27	20.93	11.27	7.08	11.94	8.14
	4	11.24	11.23	9.94	9.73	12.64	10.91	10.23	10.17	14.73	9.15	15.95	10.28	14.29	10.17	15.98	13.27	14.18	11.73	15.58	10.95
	5	11.62	14.56	12.76	12.98	12.34	16.53	10.18	11.83	14.19	14.94	17.26	12.94	16.22	12.24	13.35	16.38	14.61	10.39	16.21	13.17
	6	16.82	15.83	10.09	11.02	13.82	15.74	9.84	10.18	13.36	16.42	14.09	10.56	15.57	11.55	15.91	17.28	16.52	11.35	14.95	10.83
	7	11.81	19.32	8.14	8.25	10.57	16.35	9.45	10.72	11.78	18.28	11.25	8.92	11.92	9.18	14.27	18.08	12.94	9.77	16.13	10.26
	8	14.62	11.72	12.66	10.71	15.13	10.46	11.09	11.97	17.18	13.93	15.85	12.28	15.63	11.95	17.13	9.33	15.88	10.34	15.17	12.85
	9	10.47	17.42	8.37	9.18	8.97	17.83	11.18	10.04	13.47	18.38	14.08	9.46	15.47	10.92	10.18	17.25	16.01	11.8	12.04	9.06
	10	13.45	14.83	8.94	9.34	11.36	14.35	9.63	12.81	14.93	13.91	11.26	9.14	15.18	11.39	15.25	15.17	12.23	9.09	16.37	13.35
	11	11.53	16.18	10.02	11.22	11.24	17.63	10.94	10.99	14.82	17.24	12.58	10.97	15.04	10.07	10.44	18.85	15.95	11.57	17.84	12.95
	12	10.49	8.25	9.61	9.57	11.18	10.72	11.28	12.58	9.35	14.57	13.34	9.81	13.49	9.81	10.63	10.9	17.55	12.17	14.47	13.5
	13	13.76	15.87	13.68	13.83	13.48	14.66	15.86	16.05	15.91	18.35	18.86	14.11	15.34	13.96	15.29	16.36	19.67	15.95	20.58	16.28
	14	9.14	11.67	10.37	11.24	8.93	10.83	11.16	12.28	8.4	11.91	14.46	10.06	15.95	12.46	12.29	11.52	14.84	11.06	14.07	11.84
	15	11.84	8.98	10.18	10.98	10.75	8.17	12.52	13.05	14.42	9.57	13.27	10.34	16.47	11.22	11.96	9.69	14.18	12.08	17.48	13.36
	16	14.17	11.19	8.95	11.3	14.53	9.93	11.15	10.7	17.53	12.5	14.86	10.06	14.63	10.48	17.28	12.28	14.45	11.26	14.38	12.4
	17	9.55	13.17	12.38	14.62	12.01	12.46	13.05	12.61	10.57	15.36	13.59	11.54	19.28	14.28	13.27	10.35	19.97	14.94	17.91	13.17
	18	13.57	14.93	10.06	12.35	13.73	14.72	10.08	12.54	16.78	14.24	13.94	10.05	16.16	14.96	17.46	15.43	15.63	10.23	15.18	12.31
	19	10.39	15.37	16.83	17.45	8.16	14.17	13.17	15.15	10.23	15.58	18.27	16.32	21.62	17.47	8.73	14.82	20.92	15.28	19.03	16.06
	20	8.87	18.36	9.34	8.72	9.03	15.23	10.95	12.63	9.73	19.96	13.16	9.56	14.91	8.22	10.29	16.57	16.59	11.91	17.37	13.85
	21	14.69	14.54	11.94	13.18	15.89	15.66	9.83	9.98	16.85	15.82	15.48	12.12	16.94	13.46	13.14	16.03	14.94	9.48	14.02	11.34
	22	11.42	10.77	15.27	15.34	11.15	13.73	15.99	16.67	10.16	11.31	20.01	15.53	19.28	16.14	15.09	15.42	18.08	14.72	19.57	16.84
	23	12.47	14.93	8.16	10.14	14.73	15.58	8.17	9.26	15.84	13.47	14.35	12.75	13.94	10.65	14.5	13.02	12.93	9.19	14.53	11.63
	24	10.5	19.37	12.37	14.91	10.28	19.16	13.98	12.13	13.55	19.55	16.24	12.18	17.05	14.21	12.34	19.17	14.72	12.55	17.55	12.85
	25	10.71	16.72	9.94	10.06	12.58	16.93	10.95	10.09	12.89	14.17	13.56	10.53	16.83	11.19	17.61	18.74	15.01	11.06	14.13	12.61
	26	16.38	12.03	10.17	11.29	16.38	14.13	9.05	9.02	18.41	14.12	14.36	11.23	14.73	10.07	16.39	12.86	15.83	10.52	15.04	10.15
	27	14.14	16.92	10.02	12.72	17.14	18.17	11.14	12.27	16.83	15.69	16.28	11.86	18.23	13.04	19.92	16.17	13.08	11.84	17.98	13.95
	28	9.67	19.01	7.18	10.91	13.42	16.28	10.83	12.03	10	19.83	11.55	8.07	13.37	10.46	11.91	17.03	15.24	12.28	15.6	12.15
	29	13.18	15.53	9.93	11.03	11.9	15.06	9.56	9.69	16.26	14.68	14.3	9.41	16.26	12.06	16.39	15.69	15.05	11.05	12.92	9.06
	30	11.52	17.28	11.27	13.73	12.73	16.47	10.84	11.25	12.04	18.23	14.02	11.49	17.48	14.8	15.06	17.82	13.38	10.37	15.3	12.54
Mean		12.4557	14.9055	11.5465	12.6822	12.8728	15.0377	11.7947	12.5685	14.3812	15.2925	15.886	12.142	17.222	13.2823	14.634	15.3407	16.3342	12.3257	16.8695	13.179
SD		2.40154	3.15113	2.76124	2.70366	2.38914	2.96399	2.50515	2.60287	2.65956	2.90539	3.01545	2.70627	2.71252	2.75011	2.47726	2.96255	2.55207	2.41646	2.58088	2.44552
Kolmogorov-Smirnov Test
P		0.935	0.537	0.055	0.294	0.973	0.977	0.144	0.463	0.741	0.866	0.221	0.348	0.691	0.661	0.78	0.995	0.382	0.282	0.723	0.537
T						-1.967	-0.476	-1.076	0.454							-0.844	-0.142	-1.433	-0.71	1.302	0.392
P						0.054	0.636	0.286	0.651							0.402	0.888	0.157	0.481	0.198	0.696

## Sheet: Male
	Fitted inscribed circles-Left				Fitted inscribed circles-Right				Fitted ellipses-Left						Fitted ellipses-Right
	α	β	Diameters of C0-1	Diameters of C1-2	α	β	Diameters of C0-1	Diameters of C1-2	α	β	Long axis of C0-C1	Short axis of C0-C1	Long axis of C1-C2	Short axis of C1-C2	α	β	Long axis of C0-C1	Short axis of C0-C1	Long axis of C1-C2	Short axis of C1-C2
1	12.54	15.18	8.64	11.36	11.92	12.34	9.38	10.75	13.29	14.53	12.35	9.35	16.37	13.23	11.46	11.08	14.48	10.38	13.35	10.81
2	10.84	12.35	10.15	12.83	13.15	11.58	12.68	12.82	14.61	12.25	14.57	10.46	16.39	12.61	12.91	12.43	18.43	14.23	17.82	13.35
3	15.73	17.67	13.19	13.39	16.11	16.82	13.02	12.99	16.5	18.92	16.96	14.84	19.73	14.58	18.53	15.57	19.11	13.85	17.25	12.85
4	14.83	14.58	15.03	16.02	15.34	14.63	15.39	16.34	17.57	15.25	19.65	15.34	20.66	16.23	16.11	15.69	19.46	16.37	19.84	16.96
5	10.56	9.72	15.8	16.97	10.64	12.58	16.09	16.39	14.93	9.46	18.37	16.53	22.82	18.66	13.48	13.07	20.99	16.93	18.27	15.57
6	13.18	10.08	8.43	9.06	13.56	11.32	10.71	12.03	15.03	11.23	11.06	8.83	16.56	10.83	14.46	11.32	15.84	12.27	15.53	12.84
7	12.71	17.44	15.08	15.25	13	21.36	12.42	15.35	15.54	18.46	18.37	15.12	21.91	16.21	15.81	20.57	17.25	12.36	19.96	15.93
8	17.63	15.5	10.49	12.6	19.01	19.73	8.71	10.68	19.57	16.63	14.56	11.85	18.32	14.46	18.89	20.54	15.17	9.95	16.45	11.36
9	14.58	22.23	14.62	14.79	12.49	16.14	15.97	15.09	16.58	21.25	20.34	15.24	19.08	16.18	15.4	14.11	20.84	15.63	19.18	16.63
10	7.71	16.12	15.73	17.1	11.09	20.09	15.92	16.85	10.47	16.79	20.57	16.44	21.27	17.46	13.57	19.97	19.38	16.34	20.64	17.21
11	9.8	8.47	16.63	16.68	10.23	11.42	17.47	16.61	10.71	9.46	19.84	16.68	20.18	16.85	14.27	11.36	22.26	17.88	19.68	16.24
12	11.44	15.81	12.71	11.57	9.83	14.78	8.97	11.19	14.36	15.55	18.77	13.03	16.88	11.35	12.84	14.37	15.47	10.53	17.26	12.66
13	12.14	17.38	15.96	15.83	12.25	20.32	14.26	17.45	12.22	17.34	22.34	16.99	18.92	15.95	11.92	20.33	18.02	14.25	20.94	17.84
14	12.28	20.04	11.78	13.95	14.14	18.91	11.01	10.36	13.85	18.73	14.99	12.44	18.33	14.22	16.53	18.63	15.17	11.96	14.08	10.26
15	18.15	12.48	12.2	15.83	15.57	16.03	14.55	15.78	18.04	12.4	16.24	12.75	20.38	16.47	15.64	15.9	19.84	14.13	19.43	16.85
16	8.66	18.15	9.89	12	10.04	19.63	11.48	14.61	12.76	19.33	13.67	10.52	18.46	14.85	13.88	18.34	15.63	11.34	19.95	14.26
17	15.81	15.18	12.88	15.01	16.13	12.37	15.81	16.39	16.71	16.12	17.74	12.86	18.49	15.88	17.35	14.46	19.84	16.22	20.14	16.74
18	13.13	15.09	10.07	11.16	13.25	17.51	12.19	15.7	16.53	15.35	16.34	10.05	16.93	12.34	16.75	15.35	16.46	12.88	19.95	15.34
19	10.04	12.22	13.33	13.55	13.47	14.07	11.63	10.16	14.75	12.24	16.9	14.12	15.13	13.56	15.33	15.11	15.94	12.24	15.36	10.78
20	15.32	10.75	14.02	16.02	16.57	11.23	12.34	15.16	18.28	11.48	20.26	14.87	20.85	16.14	19.53	13.95	17.63	12.95	21.84	15.43
21	8.2	18.23	13.74	17.47	10.19	14.72	15.52	16.37	11.5	18.49	18.84	13.55	21.9	17.88	15.77	14.42	19.43	16.64	19.48	16.74
22	12.19	15.08	12.03	14.83	13.12	17.58	12.87	14.84	15.15	14.32	19.98	12.99	18.24	15.56	13.38	18.95	16.89	13.74	17.35	14.95
23	15.09	11.39	18.29	16.27	18.01	12.8	16.1	16.32	13.23	14.16	24.24	19.49	20.63	17.73	18.26	12.42	18.54	15.33	20.84	16.06
24	12.31	16.58	8.45	8.99	11.73	18.81	10.27	11.28	15.35	16.78	14.36	9.37	13.81	9.87	12.93	19.44	17.89	11.74	16.13	12.37
25	10.75	14.17	10.01	11.45	13.67	14.25	11.58	12.19	14.25	15.29	14.23	10.85	16.36	11.94	14.25	13.84	15.84	11.36	18.68	12.95
26	9.22	12.09	12.48	14.65	9.68	11.04	11.27	11.21	10.29	11.39	17.42	14.14	21.32	15.05	10.55	12.23	17.75	12.13	17.49	12.53
27	15.08	20.44	9.98	10.82	14.04	16.83	10.79	10.53	18.12	18.64	14.77	11.18	15.93	11.85	15.12	17.18	15.36	11.95	13.77	10.84
28	11.39	11.79	7.32	10.93	14.74	12.87	9.27	11.39	14.23	12.77	12.81	8.94	17.35	10.95	15.58	11.66	12.83	10.06	17.12	12.88
29	12.54	16.75	16.12	16.82	10.82	15.32	14.73	13.25	14.27	17.34	18.46	16.5	20.8	17.53	14.69	17.83	17.37	14.45	19.94	13.24
30	14.17	15.64	14.36	15.83	12.49	13.78	11.04	12.85	15.83	15.59	19.92	15.48	19.53	15.98	16.23	14.46	15.55	12.72	16.52	13.65
Mean	12.6007	14.9533	12.647	13.9677	13.2093	15.362	12.7813	13.7643	14.8173	15.2513	17.2973	13.36	18.7843	14.7467	15.0473	15.486	17.4887	13.427	18.1413	14.204
SD	2.66923	3.32738	2.83393	2.475	2.44897	3.14466	2.48986	2.40351	2.37198	3.07421	3.11017	2.79437	2.26168	2.39025	2.19309	3.01962	2.1999	2.21664	2.26387	2.25241
Kolmogorov-Smirnov Test
P	0.985	0.821	0.855	0.581	0.961	0.787	0.787	0.574	0.913	0.926	0.9	0.915	0.935	0.518	1	0.664	0.728	0.973	0.52	0.725

## Sheet: Female
	Fitted inscribed circles-Left				Fitted inscribed circles-Right				Fitted ellipses-Left						Fitted ellipses-Right
	α	β	Diameters of C0-1	Diameters of C1-2	α	β	Diameters of C0-1	Diameters of C1-2	α	β	Long axis of C0-C1	Short axis of C0-C1	Long axis of C1-C2	Short axis of C1-C2	α	β	Long axis of C0-C1	Short axis of C0-C1	Long axis of C1-C2	Short axis of C1-C2
1	11.38	17.38	7.46	7.85	13.35	15.18	8.26	8.29	13.48	16.53	11.36	8.27	11.25	8.37	16.35	15.28	11.25	8.38	12.12	9.28
2	15.27	14.21	8.19	9.03	15.84	15.27	7.59	7.27	18.12	16.84	13.91	8.18	12.81	8.81	15.94	14.17	12.49	7.29	12.47	7.89
3	14.65	18.16	9.16	9.22	12.83	19.09	6.29	6.93	16.54	15.48	12.75	9.7	14.45	10.95	12.27	20.93	11.27	7.08	11.94	8.14
4	11.24	11.23	9.94	9.73	12.64	10.91	10.23	10.17	14.73	9.15	15.95	10.28	14.29	10.17	15.98	13.27	14.18	11.73	15.58	10.95
5	11.62	14.56	12.76	12.98	12.34	16.53	10.18	11.83	14.19	14.94	17.26	12.94	16.22	12.24	13.35	16.38	14.61	10.39	16.21	13.17
6	16.82	15.83	10.09	11.02	13.82	15.74	9.84	10.18	13.36	16.42	14.09	10.56	15.57	11.55	15.91	17.28	16.52	11.35	14.95	10.83
7	11.81	19.32	8.14	8.25	10.57	16.35	9.45	10.72	11.78	18.28	11.25	8.92	11.92	9.18	14.27	18.08	12.94	9.77	16.13	10.26
8	14.62	11.72	12.66	10.71	15.13	10.46	11.09	11.97	17.18	13.93	15.85	12.28	15.63	11.95	17.13	9.33	15.88	10.34	15.17	12.85
9	10.47	17.42	8.37	9.18	8.97	17.83	11.18	10.04	13.47	18.38	14.08	9.46	15.47	10.92	10.18	17.25	16.01	11.8	12.04	9.06
10	13.45	14.83	8.94	9.34	11.36	14.35	9.63	12.81	14.93	13.91	11.26	9.14	15.18	11.39	15.25	15.17	12.23	9.09	16.37	13.35
11	11.53	16.18	10.02	11.22	11.24	17.63	10.94	10.99	14.82	17.24	12.58	10.97	15.04	10.07	10.44	18.85	15.95	11.57	17.84	12.95
12	10.49	8.25	9.61	9.57	11.18	10.72	11.28	12.58	9.35	14.57	13.34	9.81	13.49	9.81	10.63	10.9	17.55	12.17	14.47	13.5
13	13.76	15.87	13.68	13.83	13.48	14.66	15.86	16.05	15.91	18.35	18.86	14.11	15.34	13.96	15.29	16.36	19.67	15.95	20.58	16.28
14	9.14	11.67	10.37	11.24	8.93	10.83	11.16	12.28	8.4	11.91	14.46	10.06	15.95	12.46	12.29	11.52	14.84	11.06	14.07	11.84
15	11.84	8.98	10.18	10.98	10.75	8.17	12.52	13.05	14.42	9.57	13.27	10.34	16.47	11.22	11.96	9.69	14.18	12.08	17.48	13.36
16	14.17	11.19	8.95	11.3	14.53	9.93	11.15	10.7	17.53	12.5	14.86	10.06	14.63	10.48	17.28	12.28	14.45	11.26	14.38	12.4
17	9.55	13.17	12.38	14.62	12.01	12.46	13.05	12.61	10.57	15.36	13.59	11.54	19.28	14.28	13.27	10.35	19.97	14.94	17.91	13.17
18	13.57	14.93	10.06	12.35	13.73	14.72	10.08	12.54	16.78	14.24	13.94	10.05	16.16	14.96	17.46	15.43	15.63	10.23	15.18	12.31
19	10.39	15.37	16.83	17.45	8.16	14.17	13.17	15.15	10.23	15.58	18.27	16.32	21.62	17.47	8.73	14.82	20.92	15.28	19.03	16.06
20	8.87	18.36	9.34	8.72	9.03	15.23	10.95	12.63	9.73	19.96	13.16	9.56	14.91	8.22	10.29	16.57	16.59	11.91	17.37	13.85
21	14.69	14.54	11.94	13.18	15.89	15.66	9.83	9.98	16.85	15.82	15.48	12.12	16.94	13.46	13.14	16.03	14.94	9.48	14.02	11.34
22	11.42	10.77	15.27	15.34	11.15	13.73	15.99	16.67	10.16	11.31	20.01	15.53	19.28	16.14	15.09	15.42	18.08	14.72	19.57	16.84
23	12.47	14.93	8.16	10.14	14.73	15.58	8.17	9.26	15.84	13.47	14.35	12.75	13.94	10.65	14.5	13.02	12.93	9.19	14.53	11.63
24	10.5	19.37	12.37	14.91	10.28	19.16	13.98	12.13	13.55	19.55	16.24	12.18	17.05	14.21	12.34	19.17	14.72	12.55	17.55	12.85
25	10.71	16.72	9.94	10.06	12.58	16.93	10.95	10.09	12.89	14.17	13.56	10.53	16.83	11.19	17.61	18.74	15.01	11.06	14.13	12.61
26	16.38	12.03	10.17	11.29	16.38	14.13	9.05	9.02	18.41	14.12	14.36	11.23	14.73	10.07	16.39	12.86	15.83	10.52	15.04	10.15
27	14.14	16.92	10.02	12.72	17.14	18.17	11.14	12.27	16.83	15.69	16.28	11.86	18.23	13.04	19.92	16.17	13.08	11.84	17.98	13.95
28	9.67	19.01	7.18	10.91	13.42	16.28	10.83	12.03	10	19.83	11.55	8.07	13.37	10.46	11.91	17.03	15.24	12.28	15.6	12.15
29	13.18	15.53	9.93	11.03	11.9	15.06	9.56	9.69	16.26	14.68	14.3	9.41	16.26	12.06	16.39	15.69	15.05	11.05	12.92	9.06
30	11.52	17.28	11.27	13.73	12.73	16.47	10.84	11.25	12.04	18.23	14.02	11.49	17.48	14.8	15.06	17.82	13.38	10.37	15.3	12.54
Mean	12.3107	14.8577	10.446	11.3967	12.5363	14.7133	10.808	11.3727	13.945	15.3337	14.4747	10.924	15.6597	11.818	14.2207	15.1953	15.1797	11.2243	15.5977	12.154
SD	2.13667	3.02083	2.23045	2.30802	2.31971	2.78691	2.13409	2.24676	2.89318	2.77839	2.16913	2.00562	2.19177	2.28852	2.70594	2.9486	2.37772	2.11114	2.25385	2.21817
Kolmogorov-Smirnov Test
P	0.477	0.738	0.128	0.265	0.999	0.506	0.133	0.711	0.849	0.901	0.356	0.611	0.944	0.836	0.765	0.692	0.69	0.582	0.927	0.868
Compared to male, T test	0.465	0.117	3.343	4.161	1.093	0.846	3.296	3.982	1.277	-0.109	4.077	3.879	5,434	4.847	1.300	0.377	3.904	3.941	4.361	3.552
P	0.644	0.908	0.001	0.000	0.279	0.401	0.002	0.000	0.207	0.914	0.000	0.000	0.000	0.000	0.199	0.707	0.000	0.000	0.000	0.001
